# Supplementary material for: Inhibition of hepatocellular carcinoma by metabolic normalization
Source: PubMed Central journal article supplement (PMC6594671; doi:10.1371/journal.pone.0218186), 2019-06-26
Supplement: pone.0218186.s007.pdf [file pone.0218186.s007.pdf]

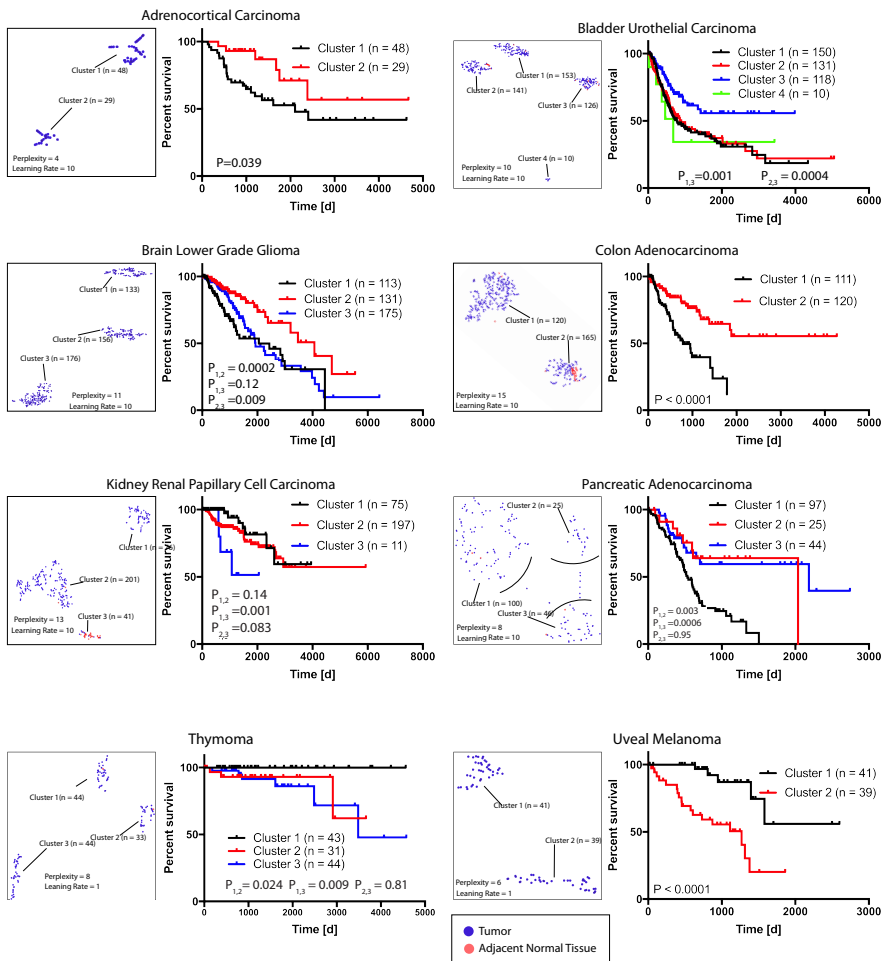

**S7 Fig. t-SNE analysis of cholesterol-related transcripts identifies distinct tumor cohorts that correlate with patient survival.** t-SNE patterns for the transcripts listed in Fig. 2J were calculated from TCGA expression profiles and displayed as previously described (blue dots) [17]. Where available, t-SNE patterns for matched normal human tissues were similarly calculated and plotted (red dots). Kaplan-Meier survival data for each of the tumor cohorts were then plotted as shown in Fig. 4E.
