# Supplementary material for: Inhibition of hepatocellular carcinoma by metabolic normalization
Source: PubMed Central journal article supplement (PMC6594671; doi:10.1371/journal.pone.0218186), 2019-06-26
Supplement: pone.0218186.s008.pdf [file pone.0218186.s008.pdf]

Liver Hepatocellular Carcinoma

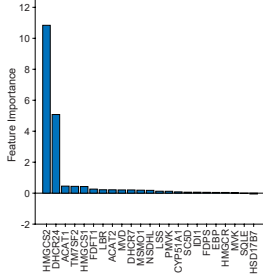

Adrenocortical Carcinoma

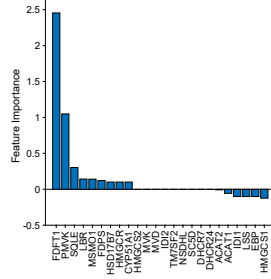

Bladder Urothelial Carcinoma

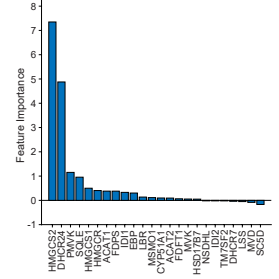

Brain Lower Grade Glioma

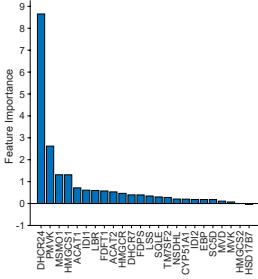

Colon Adenocarcinoma

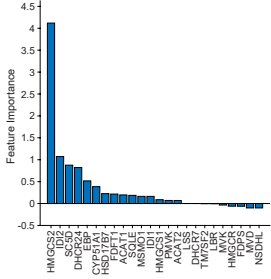

Kidney Renal Papillary Cell Carcinoma

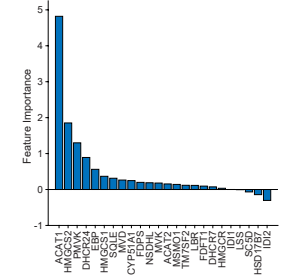

Pancreatic Adenocarcinoma

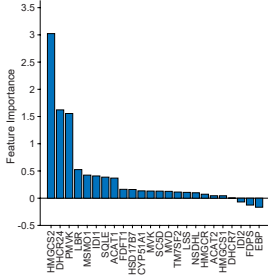

Thymoma

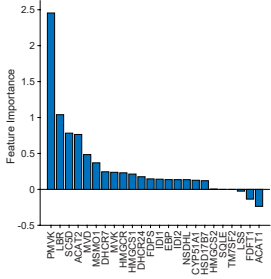

Skin Cutaneous Melanoma

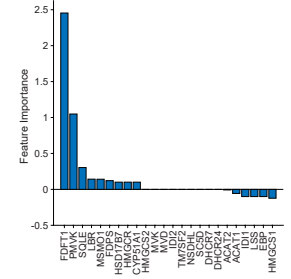

S8 Fig. Random Forest classification of cholesterol biosynthesis-related transcripts most responsible for t-SNE clustering patterns in nine tumors. Each of the histograms indicates the transcripts that were the most deterministic of the patterns depicted in S7 Fig.
