# Supplementary material for: Inhibition of hepatocellular carcinoma by metabolic normalization
Source: PubMed Central journal article supplement (PMC6594671; doi:10.1371/journal.pone.0218186), 2019-06-26
Supplement: pone.0218186.s010.pdf [file pone.0218186.s010.pdf]

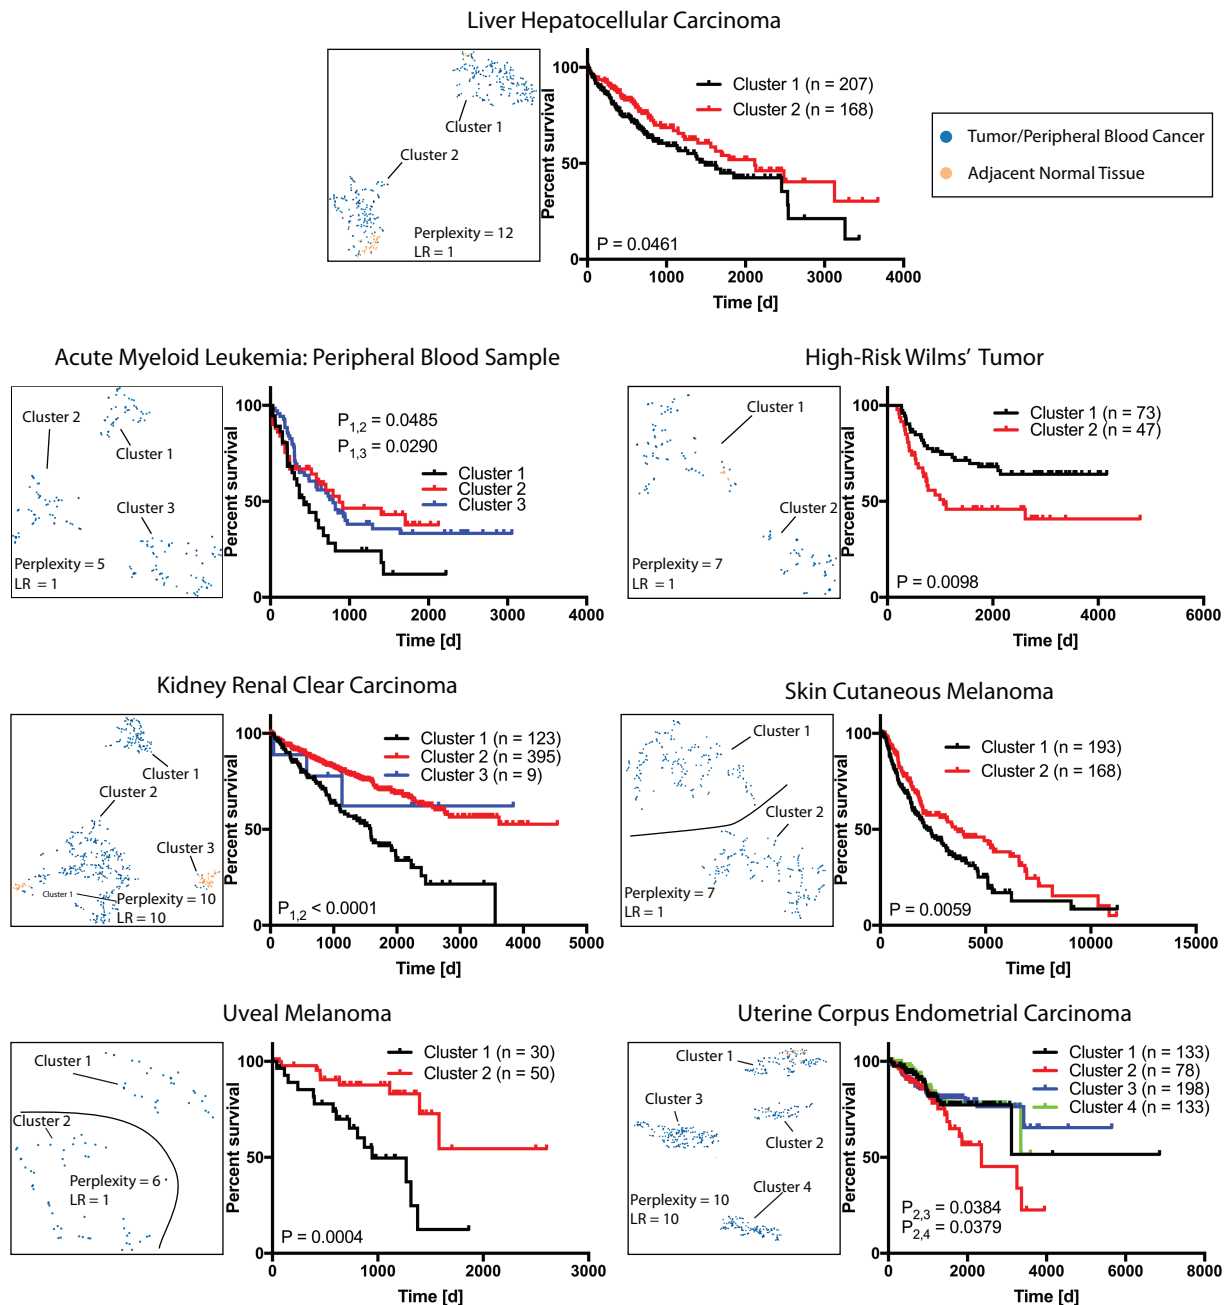

**S10 Fig. t-SNE analysis of FAO-related transcripts identifies distinct tumor cohorts that correlate with patient survival.** t-SNE for the FAO transcripts depicted in S2B&C Fig were analyzed in TCGA tumor types. Kaplan-Meier survival curves were then plotted for each of the clusters where significant survival differences for the indicated tumor type were observed.
