# Supplementary material for: Inhibition of hepatocellular carcinoma by metabolic normalization
Source: PubMed Central journal article supplement (PMC6594671; doi:10.1371/journal.pone.0218186), 2019-06-26
Supplement: pone.0218186.s011.pdf [file pone.0218186.s011.pdf]

## Liver Hepatocellular Carcinoma

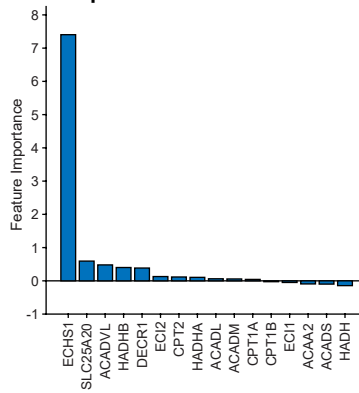

## Acute Myeloid Leukemia: Peripheral Blood Sample

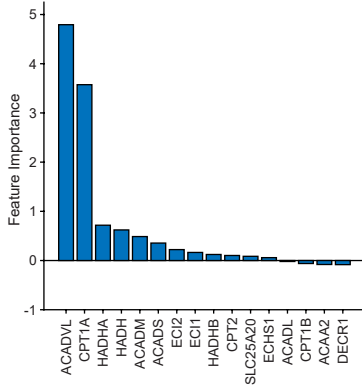

## High-Risk Wilms' Tumor

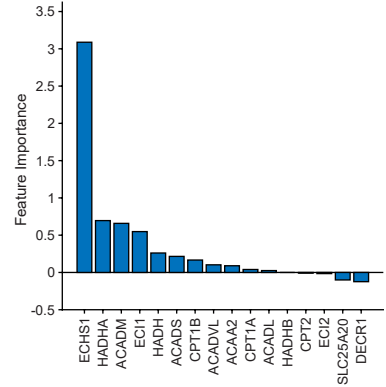

## Kidney Renal Clear Cell Carcinoma

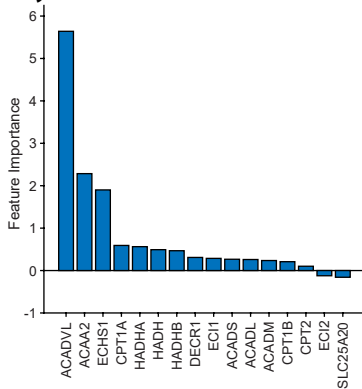

## Skin Cutaneous Melanoma

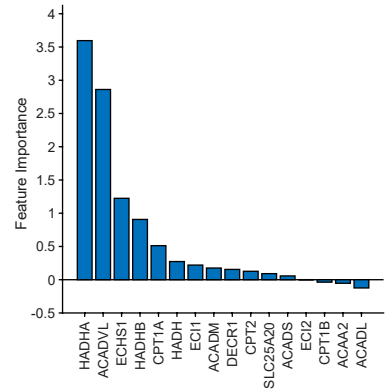

## Uveal Melanoma

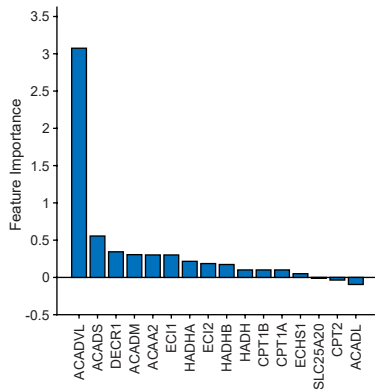

## Uterine Corpus Endometrial Carcinoma

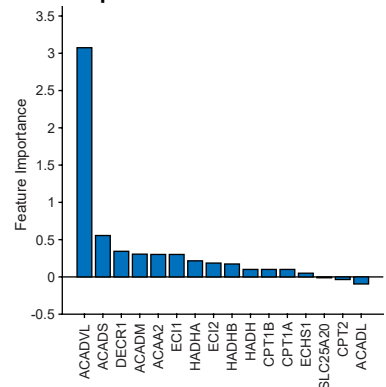

**S11 Fig. Random Forest classification of FAO-related transcripts most responsible for t-SNE clustering patterns.**

Each of the histograms indicates those transcripts which were the most deterministic of the patterns depicted in S10 Fig.
